# Supplementary material
Source: Springer Nature journal article supplement (https://www.springermedizin.de/resource/supplementary/12957_2011_971_MOESM5_ESM.pdf/9562098)

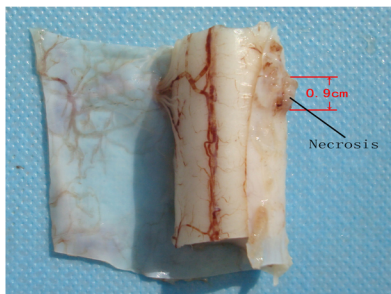

a

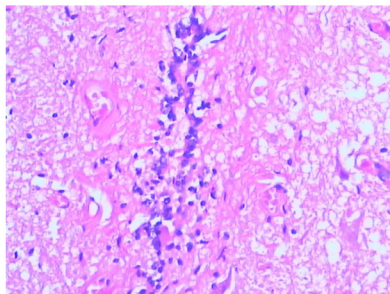

b

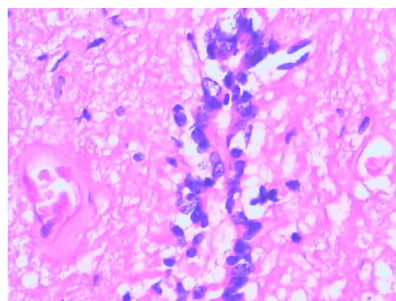

c

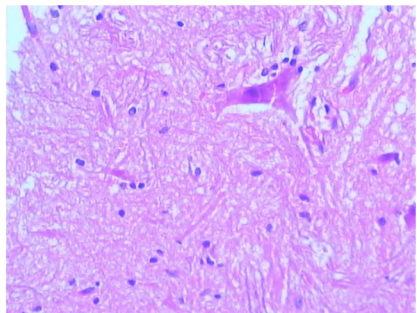

d

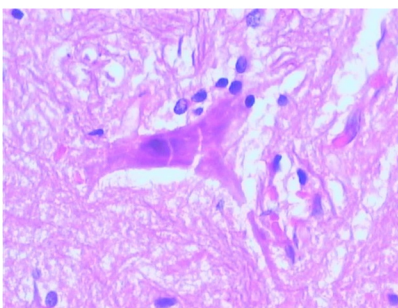

e

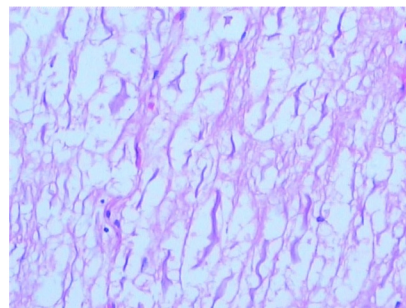

f

Supplement: MOESM5 [file 9562098]
